# Supplementary material for: Eater cooperates with Multiplexin to drive the formation of hematopoietic compartments
Source: eLife. 2020 Oct 7;9:e57297. doi: 10.7554/eLife.57297 (PMC7541089; doi:10.7554/eLife.57297)
Supplement: Figure 1—source data 1. [file elife-57297-fig1-data1.xlsx]

## Sheet: Figure 1E
Figure 1E: Quantification of FBAH number in control and C7>Atf3WT larvae.
Hml:DsRed C7>GFP
control	Atf3WT
0	140
0	617
0	579
0	224
0	796
0	311
0	400
0	335
1	209
0	525
0	371
0	456
0	734
1	701
0
