# Supplementary material for: Eater cooperates with Multiplexin to drive the formation of hematopoietic compartments
Source: eLife. 2020 Oct 7;9:e57297. doi: 10.7554/eLife.57297 (PMC7541089; doi:10.7554/eLife.57297)
Supplement: Figure 1—source data 2. — For graphical representation the data was normalized to the average of the control. [file elife-57297-fig1-data2.xlsx]

## Sheet: Figure 1-figure supplement 1C
Figure 1-figure supplement 1C: Circulating hemocyte counts from control and Atf3 overexpressing larvae. For graphical representation the data was normalized to the average of the control.
Hml:DsRed C7>GFP
control	Atf3WT		control mean:
439	667		590.429
453	437
559	391
216	1784
952	206
465	300
1049	244
	308
	257
	204
	249
