# Supplementary material for: Eater cooperates with Multiplexin to drive the formation of hematopoietic compartments
Source: eLife. 2020 Oct 7;9:e57297. doi: 10.7554/eLife.57297 (PMC7541089; doi:10.7554/eLife.57297)
Supplement: Figure 2—source data 1. [file elife-57297-fig2-data1.xlsx]

## Sheet: Figure 2I
Figure 2I: Quantification of FBAH number in C7>Atf3WT larvae without parasitoid wasp infection and 48 hours post-infection.
Hml:DsRed C7>GFP Atf3WT
uninf.	48h p.i.
229	19
324	4
139	8
499	1
357	4
204	2
311	22
111	72
262	111
26	6
265	114
240	12
228	74
377	66
681	1
359	1
	4
