# Supplementary material for: Eater cooperates with Multiplexin to drive the formation of hematopoietic compartments
Source: eLife. 2020 Oct 7;9:e57297. doi: 10.7554/eLife.57297 (PMC7541089; doi:10.7554/eLife.57297)
Supplement: Figure 2—source data 2. [file elife-57297-fig2-data2.xlsx]

## Sheet: Figure 2J
Figure 2J: The percentage of lamellocytes 24 hours after L. boulardi infestation in control and C7>Atf3WT larvae.
Hml:DsRed C7>GFP				Hml:DsRed C7>GFP Atf3WT
Total DAPI	L1 positive	Percent		Total DAPI	L1 positive	Percent
471	95	20.1699		799	168	21.0263
744	120	16.129		975	163	16.7179
379	176	46.438		762	180	23.622
1061	115	10.8388		668	83	12.4251
875	104	11.8857		853	125	14.6542
748	86	11.4973		776	88	11.3402
