# Supplementary material for: Eater cooperates with Multiplexin to drive the formation of hematopoietic compartments
Source: eLife. 2020 Oct 7;9:e57297. doi: 10.7554/eLife.57297 (PMC7541089; doi:10.7554/eLife.57297)
Supplement: Figure 3—source data 1. [file elife-57297-fig3-data1.xlsx]

## Sheet: Figure 3K
Figure 3K: Quantification of FBAH number in C7>Atf3WT and C7>Atf3WTMpRNAi larvae.
Hml:DsRed C7>GFP
Atf3WT	Atf3WTMpRNAi
1149	0
417	0
23	18
177	8
360	5
82	0
812	0
153	3
800	0
492	0
547	0
722	2
528	0
190	0
1188	20
The quantifications of FBAH in C7>Atf3WT and C7>Atf3WTMpRNAi genotypes were perfomed within the same experiments with those presented in Figure 3-figure supplement 1I.
