# Supplementary material for: Eater cooperates with Multiplexin to drive the formation of hematopoietic compartments
Source: eLife. 2020 Oct 7;9:e57297. doi: 10.7554/eLife.57297 (PMC7541089; doi:10.7554/eLife.57297)
Supplement: Figure 3—source data 2. [file elife-57297-fig3-data2.xlsx]

## Sheet: Figure 3O
Figure 3O: Quantification of sessile hemocyte intensity in control, C7>Atf3WT and C7>Atf3WTMpRNAi larvae. For graphical representation the data was normalized to the average of the control.
Hml:DsRed C7>GFP
control	Atf3WT	Atf3WTMpRNAi			control mean:
30476	10087	26763			29138.4
30980	21118	29092
21203	21533	36114
32626	20333	25065
30407	21324	36475
Data represents average Hml:DsRed fluorescence intesity values measured in Fiji v1.52i
