# Supplementary material for: Eater cooperates with Multiplexin to drive the formation of hematopoietic compartments
Source: eLife. 2020 Oct 7;9:e57297. doi: 10.7554/eLife.57297 (PMC7541089; doi:10.7554/eLife.57297)
Supplement: Figure 3—source data 3. [file elife-57297-fig3-data3.xlsx]

## Sheet: Figure 3-figure supplement 1I
Figure 3-figure supplement 1I: Quantification of FBAH number in C7>Atf3WT, C7>Atf3WTCol4a1RNAi, C7>Atf3WTtrolRNAi, C7>Atf3WTvkgRNAi, C7>Atf3WTLanARNAi, C7>Atf3WTLanB1RNAi and C7>Atf3WTLanB2RNAi larvae.
Hml:DsRed C7>GFP
Atf3WT	Atf3WTCol4a1RNAi	Atf3WTtrolRNAi	Atf3WTvkgRNAi	Atf3WTLanARNAi	Atf3WTLanB1RNAi	Atf3WTLanB2RNAi
233	14	1	46	496	356	828
454	10	0	31	284	554	516
295	9	8	144	228	343	439
406	4	5	30	518	483	206
607	1	0	46	331	448	797
625	14	0	29	353	449	253
263	18	14	48	448	613	661
599	0	7	100	749	672	897
469	10	12	101	591	154	283
281	13	11	75	771	469	354
479	0	5	115	159	224	599
579	5	212	109	196	597	174
468	29	45	74	464	362	276
421	8	3	116	556	296	570
417	12	3	157	242	466	201
The quantifications of FBAH numbers for genotypes presented in Figure 3-figure supplement 1I were performed within the same experiments with those presented in Figure 3K.
