# Supplementary material for: Eater cooperates with Multiplexin to drive the formation of hematopoietic compartments
Source: eLife. 2020 Oct 7;9:e57297. doi: 10.7554/eLife.57297 (PMC7541089; doi:10.7554/eLife.57297)
Supplement: Figure 3—source data 4. — For graphical representation, the data was normalized to the average of the control. [file elife-57297-fig3-data4.xlsx]

## Sheet: Figure 3-figure supplement 2
Figure 3-figure supplement 2F: Quantification of FBAH number in control, C7>Atf3WT, C7>Atf3WTMpRNAi, C7>Atf3WTSPARCRNAi and C7>Atf3WTSPARCRNAiMpRNAi larvae.
Hml:DsRed C7>GFP
control	Atf3WT	Atf3WTMpRNAi	Atf3WTSPARCRNAi	Atf3WTSPARCRNAiMpRNAi
0	1149	0	704	53
0	417	0	683	32
1	23	18	659	19
0	177	8	818	28
0	360	5	862	7
0	82	0	738	12
0	812	0	640	19
1	153	3	591	29
0	800	0	577	15
0	492	0	1042	20
0	547	0	998
0	722	2	1089
0	528	0	996
0	190	0	705
0	1188	20	541
