# Supplementary material for: Eater cooperates with Multiplexin to drive the formation of hematopoietic compartments
Source: eLife. 2020 Oct 7;9:e57297. doi: 10.7554/eLife.57297 (PMC7541089; doi:10.7554/eLife.57297)
Supplement: Figure 4—source data 1. [file elife-57297-fig4-data1.xlsx]

## Sheet: Figure 4E
Figure 4E: Quantification of FBAH number in control, C7>Atf3WT and C7>Atf3WTeater1 larvae.
Hml:DsRed C7>GFP
control	Atf3WT	Atf3WTeater1
3	211	0
0	353	0
0	781	0
0	404	0
0	390	0
0	773	0
0	138	7
0	604	0
0	375	1
0	233	0
0	356	0
0	488	0
1	264	2
0	109	0
0	799	0
