# Supplementary material for: Eater cooperates with Multiplexin to drive the formation of hematopoietic compartments
Source: eLife. 2020 Oct 7;9:e57297. doi: 10.7554/eLife.57297 (PMC7541089; doi:10.7554/eLife.57297)
Supplement: Figure 4—source data 2. [file elife-57297-fig4-data2.xlsx]

## Sheet: Figure 4J
Figure 4J: Quantification of FBAH number in C7>Hml>Atf3WT and C7>Hml>Atf3WTeaterRNAi larvae.
Hml:DsRed C7>Hml>GFP
Atf3WT	Atf3WTeaterRNAi
490	31
432	115
894	91
571	28
494	14
