# Supplementary material for: Eater cooperates with Multiplexin to drive the formation of hematopoietic compartments
Source: eLife. 2020 Oct 7;9:e57297. doi: 10.7554/eLife.57297 (PMC7541089; doi:10.7554/eLife.57297)
Supplement: Figure 4—source data 3. — For graphical representation, the data was normalized to the average of the control. [file elife-57297-fig4-data3.xlsx]

## Sheet: Figure 4M
Figure 4M: Quantification of sessile hemocyte intensity in control and a58>MpRNAi larvae. For graphical representation the data was normalized to the average of the control.
Hml:DsRed a58>GFP
control	MpRNAi			control mean:
21151	3332			28186.2
30646	11675
22548	7451
35447	9191
31139	6110
Data represents average Hml:DsRed fluorescence intesity values measured in Fiji v1.52i
