# Supplementary material for: Eater cooperates with Multiplexin to drive the formation of hematopoietic compartments
Source: eLife. 2020 Oct 7;9:e57297. doi: 10.7554/eLife.57297 (PMC7541089; doi:10.7554/eLife.57297)
Supplement: Figure 5—source data 1. — For graphical representation, the data was normalized to the average of the control. [file elife-57297-fig5-data1.xlsx]

## Sheet: Figure 5E
Figure 5E: Quantification of sessile hemocyte intensity in control and C7>Mp::GFP larvae. For graphical representation the data was normalized to the average of the control.
Hml:DsRed C7>GFP
control	Mp::GFP			control mean:
26560	4607			31892.4
31856	14958
30420	13563
30575	11897
40051	7740
Data represents average Hml:DsRed fluorescence intesity values measured in Fiji v1.52i
