# Supplementary material for: Eater cooperates with Multiplexin to drive the formation of hematopoietic compartments
Source: eLife. 2020 Oct 7;9:e57297. doi: 10.7554/eLife.57297 (PMC7541089; doi:10.7554/eLife.57297)
Supplement: Figure 5—source data 2. — For graphical representation, the data was normalized to the average of the control. [file elife-57297-fig5-data2.xlsx]

## Sheet: Figure 5F
Figure 5F: Circulating hemocyte counts from control, Mp::GFP overexpressing and eater1 mutant larvae. For graphical representation the data was normalized to the average of the control.
Hml:DsRed C7>GFP
control	Mp::GFP	eater1		control mean:
298	381	453		195.125
245	301	377
112	329	960
192	376	614
185	344	555
128	280	450
202	621	564
199	476	325
